# Supplementary material
Source: MDPI journal article supplement (https://www.mdpi.com/search?q=molecules-24-02177)

# **Metal-free air oxidation in a convenient cascade approach for the access to Isoquinoline-1,3,4(2H)-triones**

**Antonia Di Mola<sup>1\*</sup>, Consiglia Tedesco<sup>1</sup> and Antonio Massa<sup>1\*</sup>**

Dipartimento di Chimica e Biologia "A. Zambelli", Università degli studi di Salerno, Via Giovanni Paolo II, 84084-Fisciano (SA), Italy.

\* Correspondence: amassa@unisa.it., toniadimola@libero.it, Phone: +39-089969565.

## **Contents**

|                                                                        |   |
|------------------------------------------------------------------------|---|
| 1. X-Ray data 2-benzylisoquinoline-1,3,4(2H)-trione ( <b>3a</b> )..... | 2 |
| 2. NMR Spectra of compounds .....                                      | 4 |

Single crystals suitable for X-ray diffraction studies of compound **3a** were obtained by recrystallization from CHCl<sub>3</sub>/hexane solution. The X-ray molecular structure is shown in Figure S1. Bond distances and angles are similar to those of analogous iso-quinoline-1,3,4-trione compounds (R. M. Ghalib, C. S. Chidan Kumar, R. Hashim, O. Sulaiman and H.-K. Fun Acta Cryst. E, **2015**, 71, o6-o7).

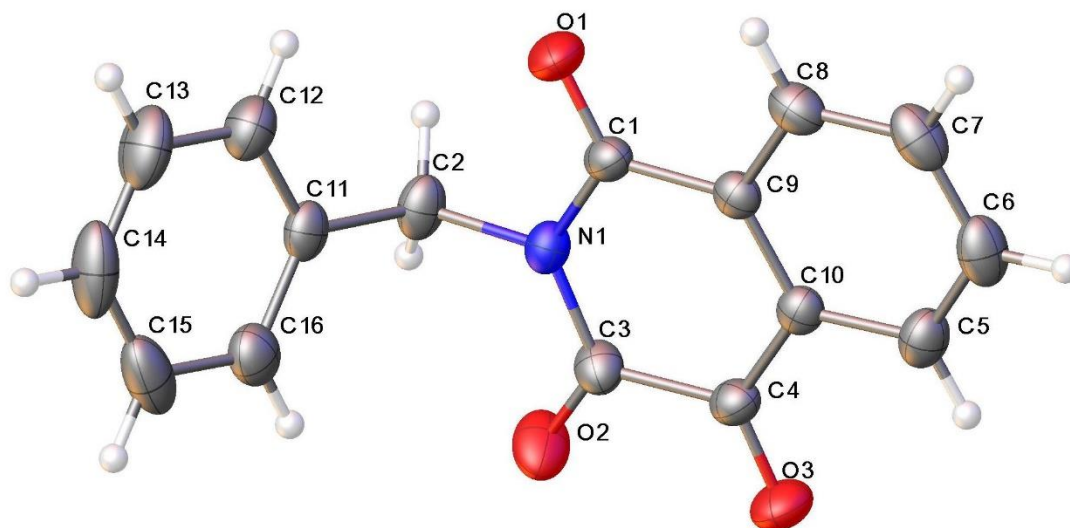

**Figure 1.** The X-ray molecular structure of compound **3a**.

### X-ray crystallography

Colourless prismatic single crystals of compound **3a** suitable for X-ray diffraction analysis were obtained by CHCl<sub>3</sub>/hexane solution.

A suitable crystal (0.44 mm × 0.35 mm × 0.27 mm)

was glued on a glass fiber and measured at room temperature at room temperature with a Bruker D8 QUEST diffractometer equipped with a PHOTON100 detector using CuK $\alpha$  radiation ( $\lambda = 1.54178 \text{ \AA}$ ). Indexing was performed using APEX3.<sup>1</sup> Data integration and reduction were performed using SAINT.<sup>1</sup> Absorption correction was performed by multi-scan method in SADABS.<sup>1</sup>

The structure was solved by Direct Methods using SIR2014<sup>2</sup> and refined by means of full matrix least-squares based on  $F^2$  using the program SHELXL.<sup>3</sup> 18760 reflections were collected, resulting in 2328 independent reflections ( $R_{\text{int}} = 0.0199$ ,  $R_{\text{sigma}} = 0.0123$ ).

Non-hydrogen atoms were refined anisotropically, hydrogen atoms were positioned geometrically and included in structure factors calculations, but not refined. 181 refinable parameters were finally considered, final disagreement  $R$  indices (all data) are:  $R = 0.0496$ ,

$wR_2 = 0.1249$ . The maximum and minimum residual densities were respectively 0.18/-0.20  $e\text{\AA}^{-3}$ .

Crystal structures were drawn using OLEX2.<sup>4</sup>

**Crystal data.** Formula:  $C_{16}H_{11}NO_3$ , Formula weight: 265.26, Crystal system: monoclinic, Space group:  $P2_1/n$ ,  $a = 13.148(2) \text{\AA}$ ,  $b = 7.3323(8) \text{\AA}$ ,  $c = 13.8239(12) \text{\AA}$ ,  $\beta 107.179(9)^\circ$   $V = 1273.2(3) \text{\AA}^3$ ,  $Z = 4$ ,  $\rho_{\text{calc}} = 1.384 \text{ g/cm}^3$ ,  $\mu = 0.795 \text{ mm}^{-1}$ ,  $F(000) = 552.0$

**Supporting Information Available:** Diffraction data in cif format of compounds **3a**

**CCDC 1915668**

## References

- [<sup>1</sup>] CrystalClear, Crystal Structure Analysis Package, Rigaku-Molecular Structure Corp.
- [<sup>2</sup>] APEX3, SAINT, SADABS. Bruker AXS Inc., Madison, Wisconsin, USA. Bruker AXS Inc., Madison, Wisconsin, USA, **2012**.
- [<sup>3</sup>] Burla, M. C.; Caliandro, R.; Carrozzini, B.; Cascarano, G. L.; Cuocci, C.; Giacovazzo, C.; Mallamo, M.; Mazzone, A.; Polidori, G. Crystal structure determination and refinement via SIR2014. *J. Appl. Cryst.* **2015**, *48*, 306-309.
- [<sup>4</sup>] Sheldrick, G. M. Crystal structure refinement with SHELXL. *Acta Cryst.* **2015**, *C71*, 3–8
- [<sup>5</sup>] Dolomanov, O. V.; Bourhis, L. J.; Gildea, R. J.; Howard, J. A. K.; Puschmann, H. OLEX2: a complete structure solution, refinement and analysis program. *J. Appl. Cryst.* **2009**, *42*, 339–341.

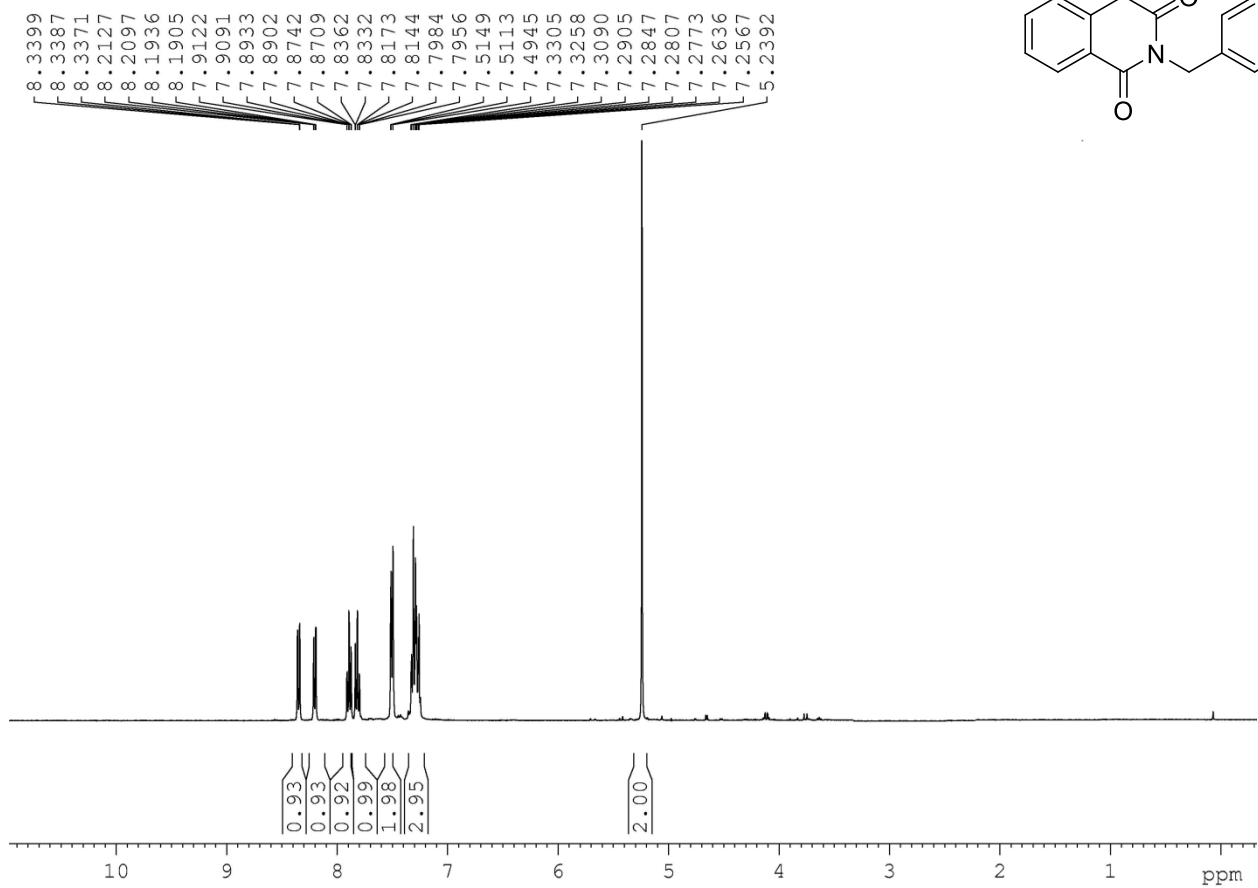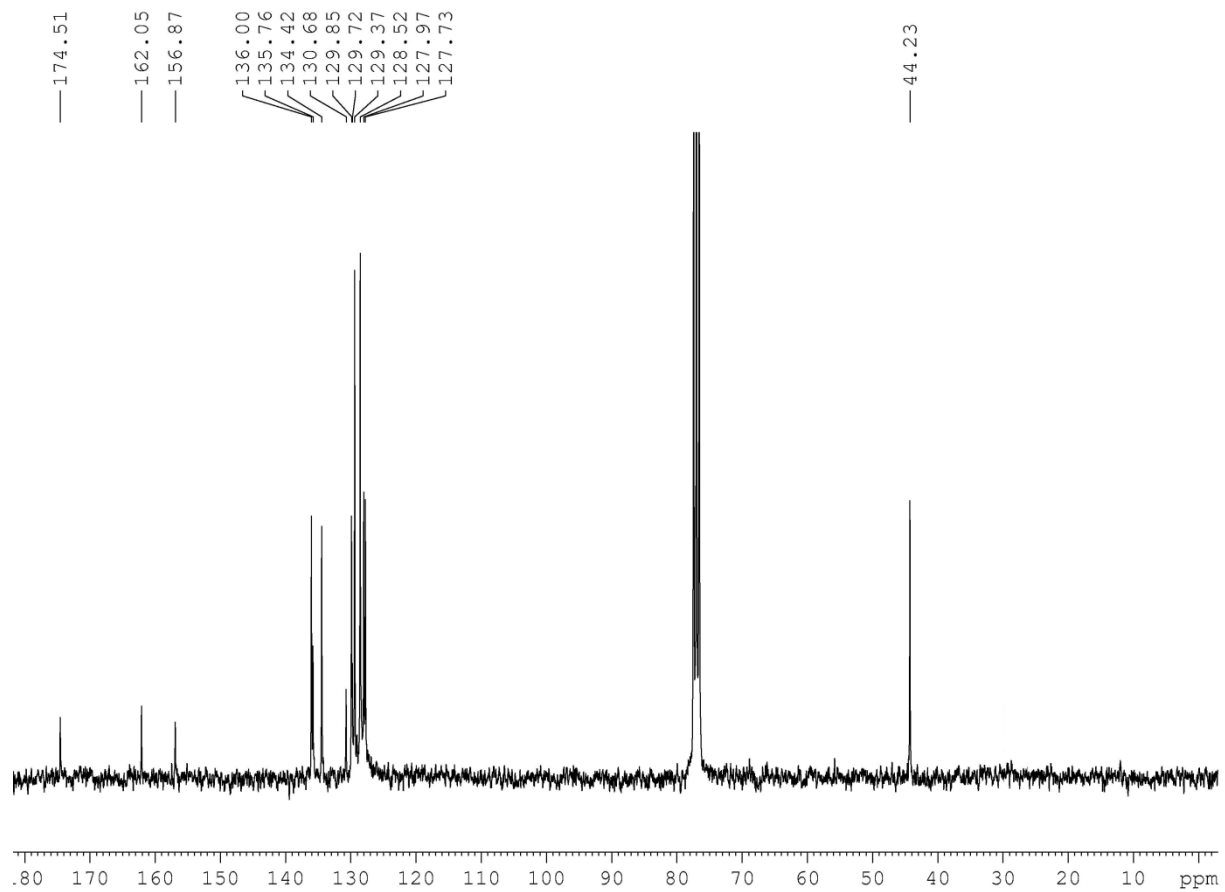

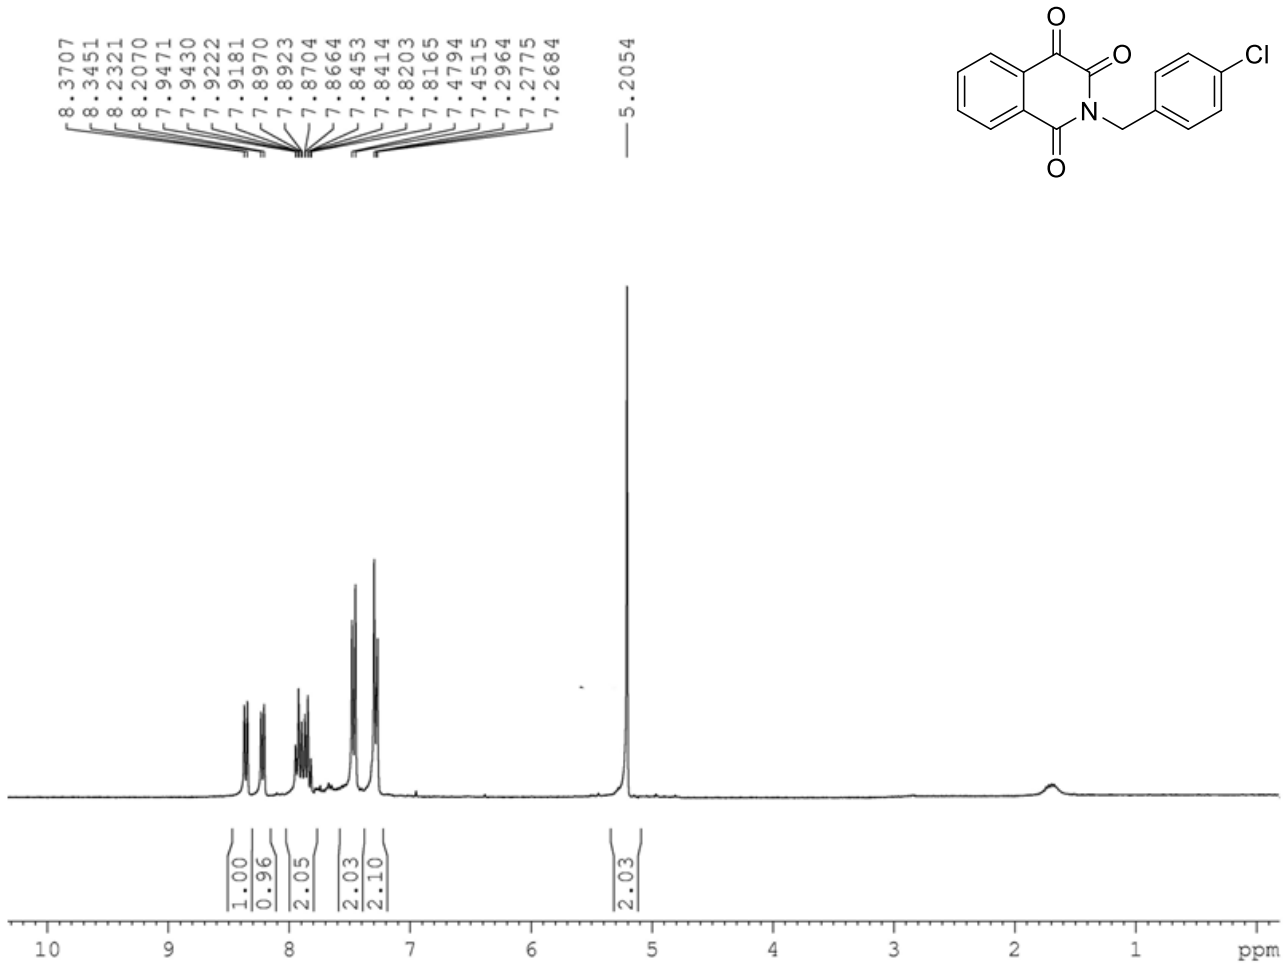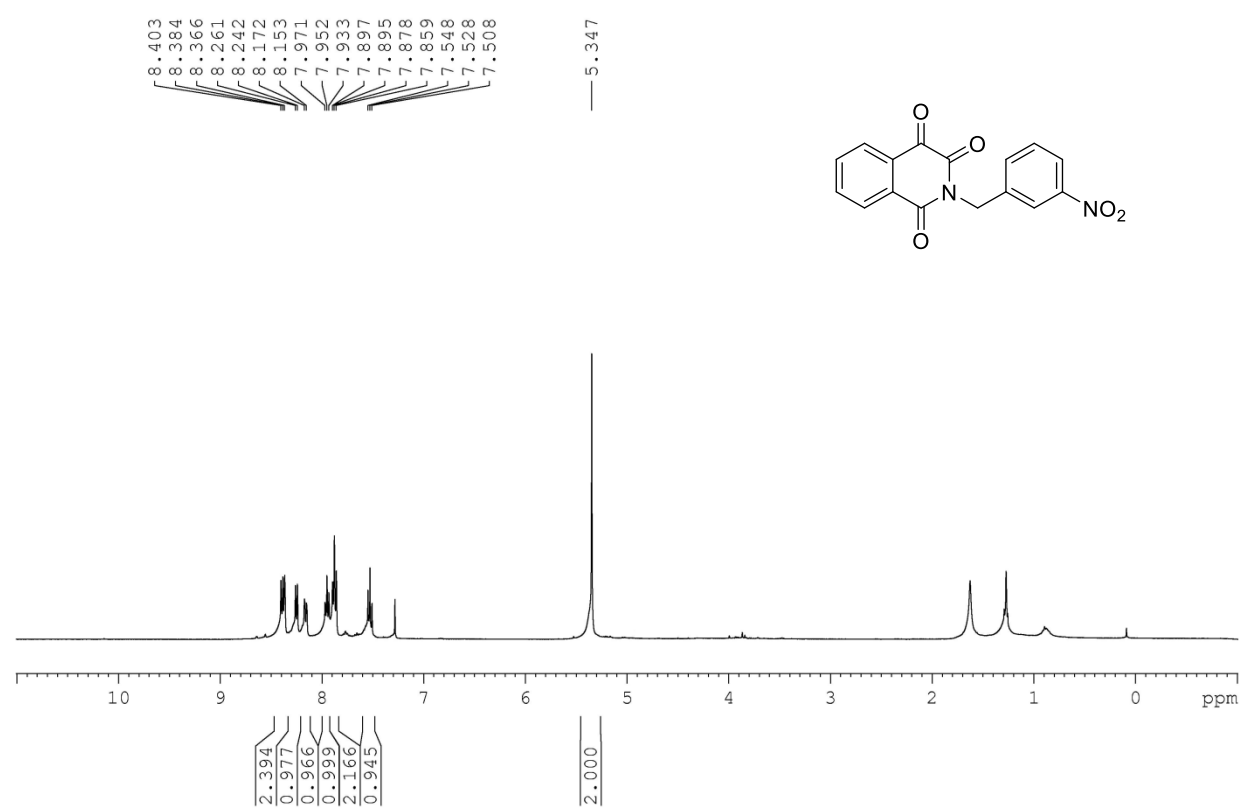

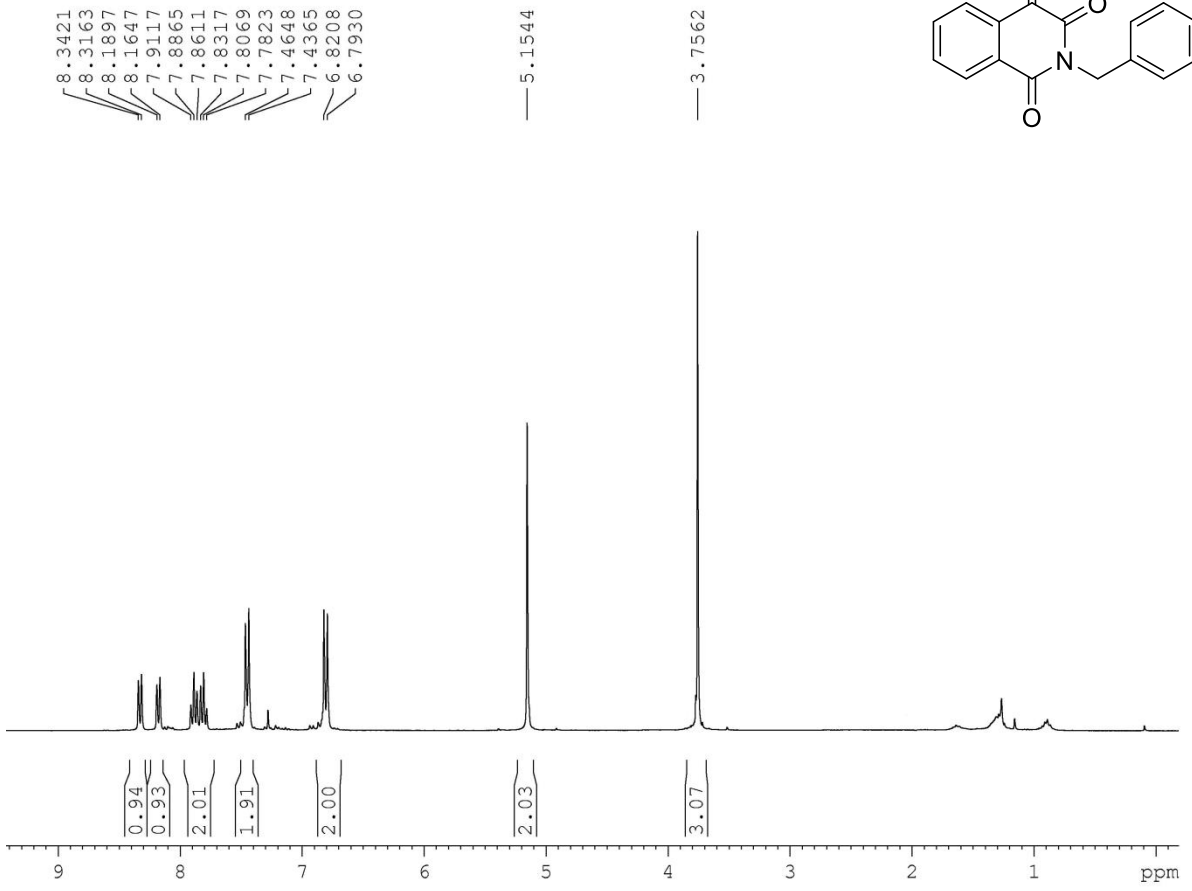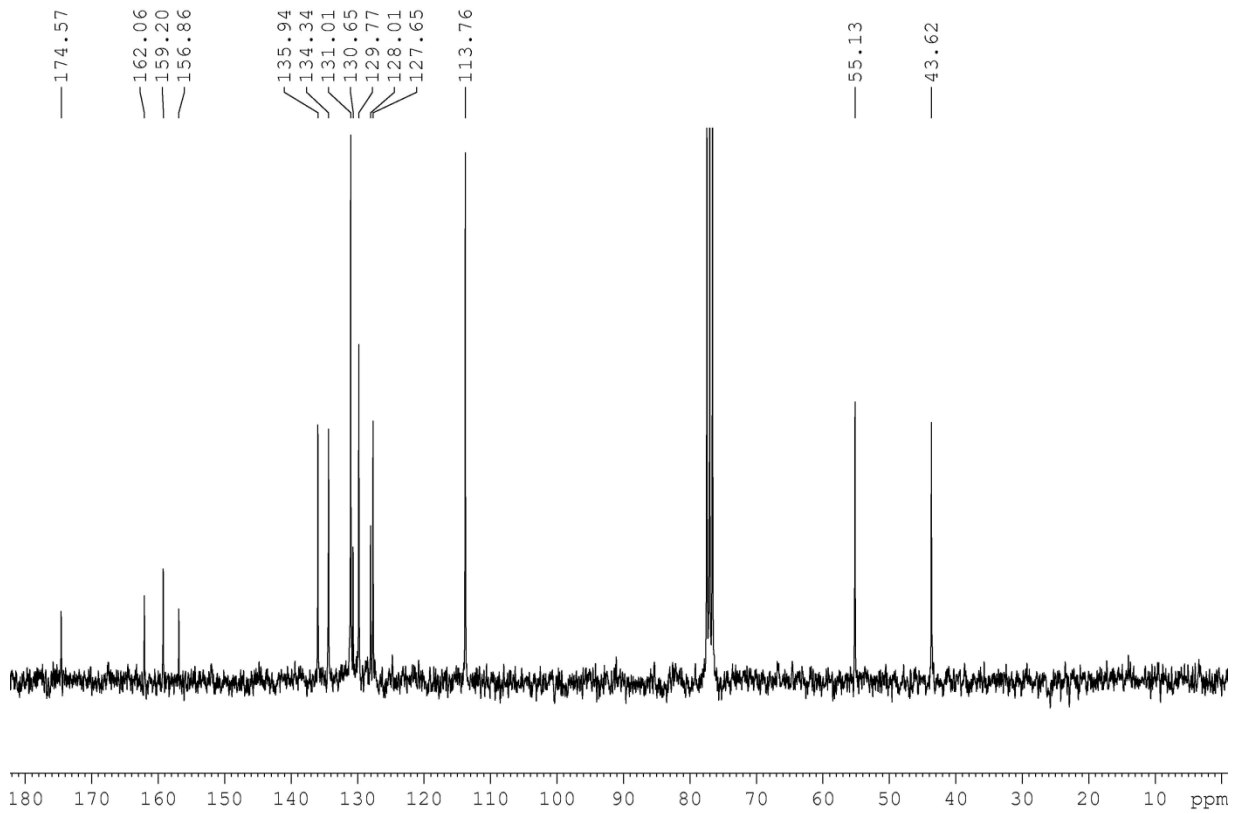

8.265  
8.248  
8.246  
7.954  
7.951  
7.935  
7.932  
7.916  
7.913  
7.885  
7.882  
7.866  
7.863  
7.847  
7.844  
7.377  
7.359  
7.342  
7.304  
7.299  
7.283  
7.271  
7.266  
7.252  
7.110  
7.093  
7.073  
7.049  
5.361

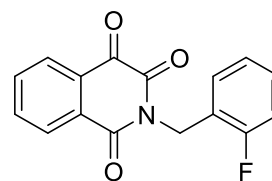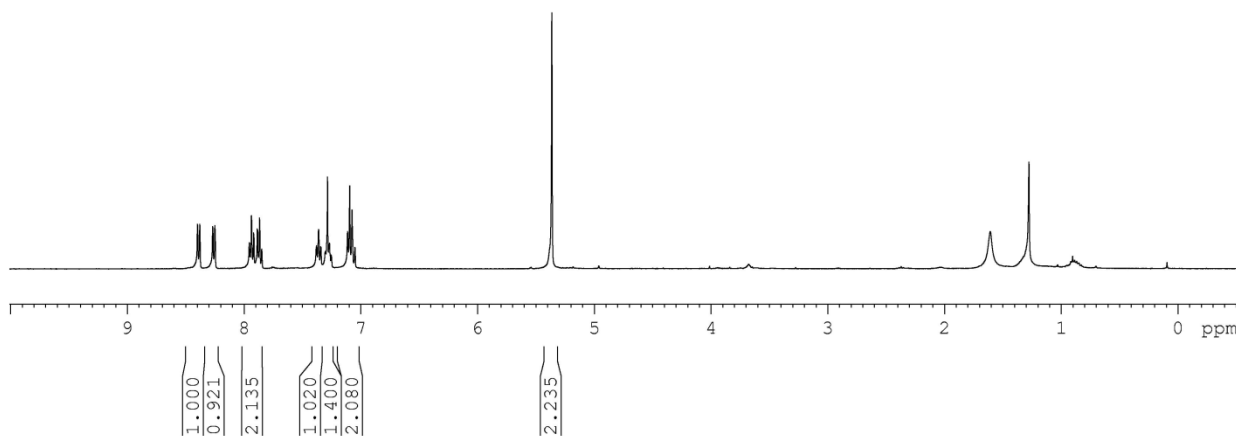

174.44  
161.95  
161.93  
159.49  
156.87  
136.12  
134.56  
130.83  
130.13  
130.10  
130.02  
129.72  
129.64  
129.56  
127.87  
124.18  
124.14  
122.77  
122.62  
115.72  
115.50

38.36  
38.32

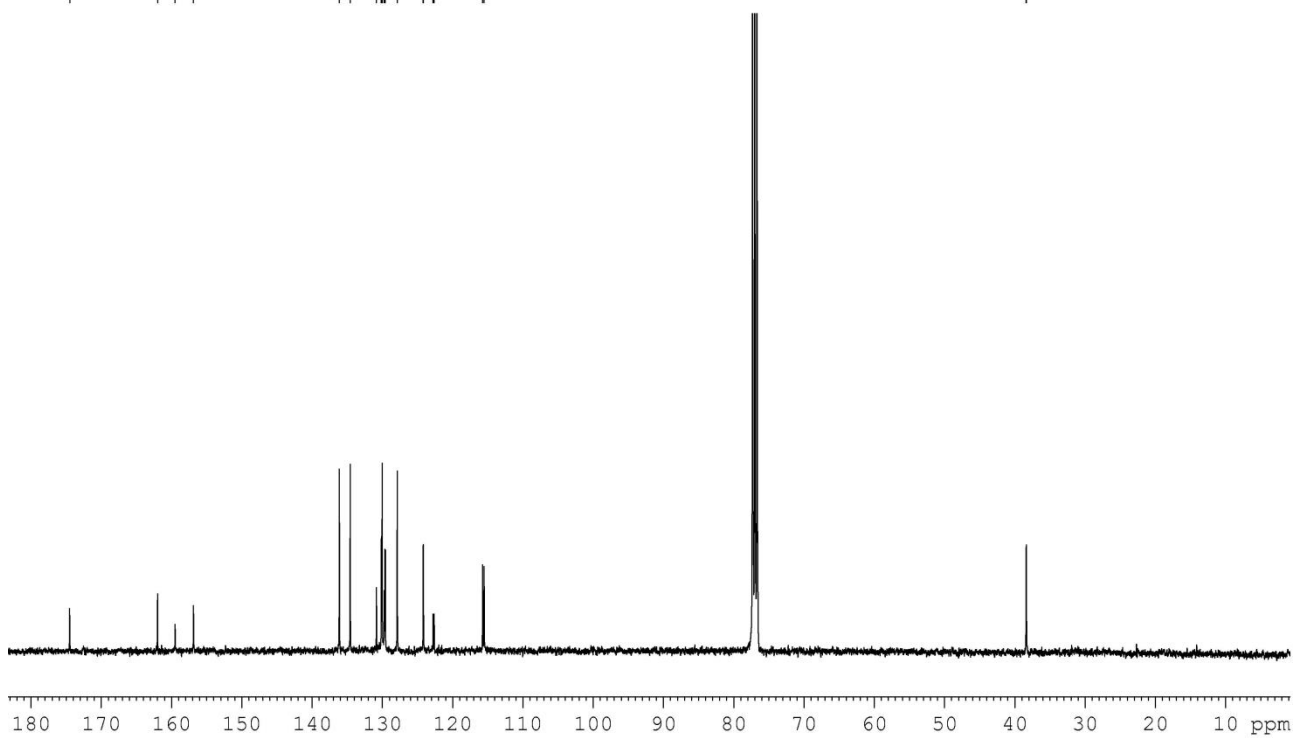

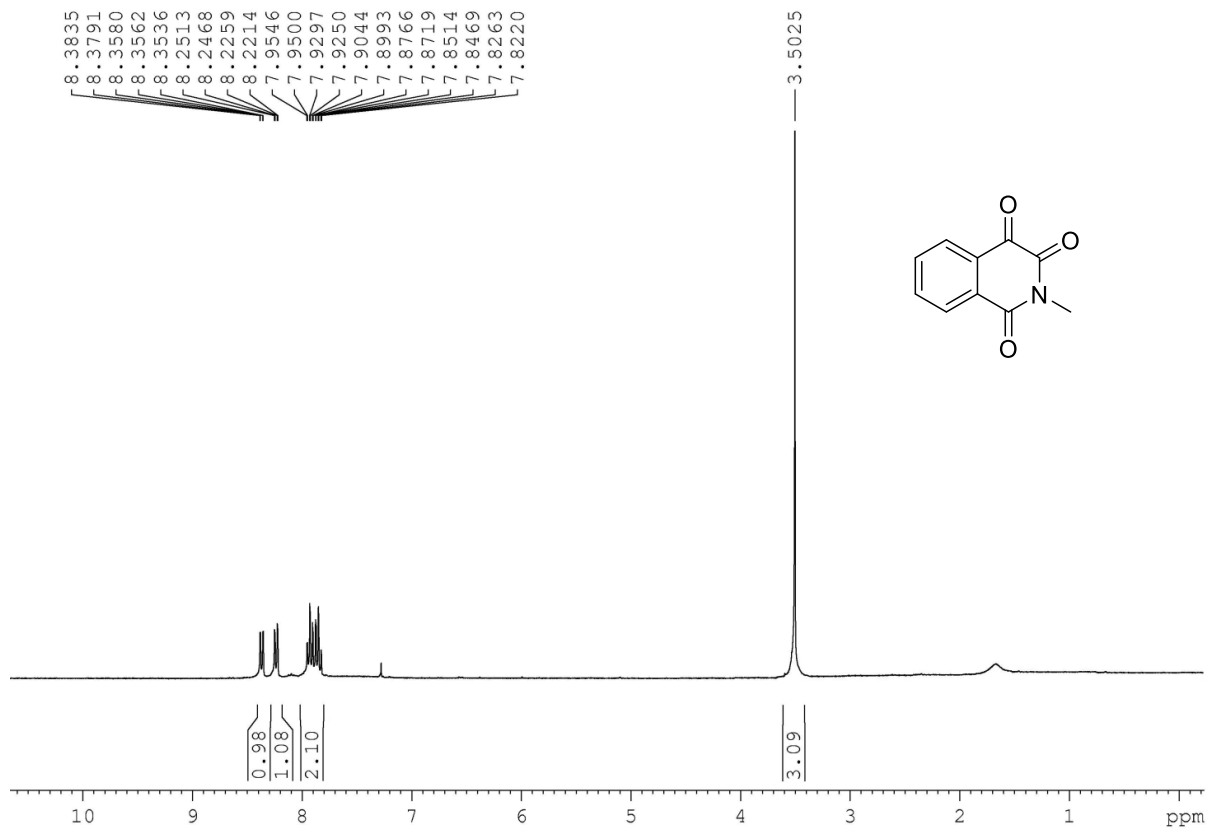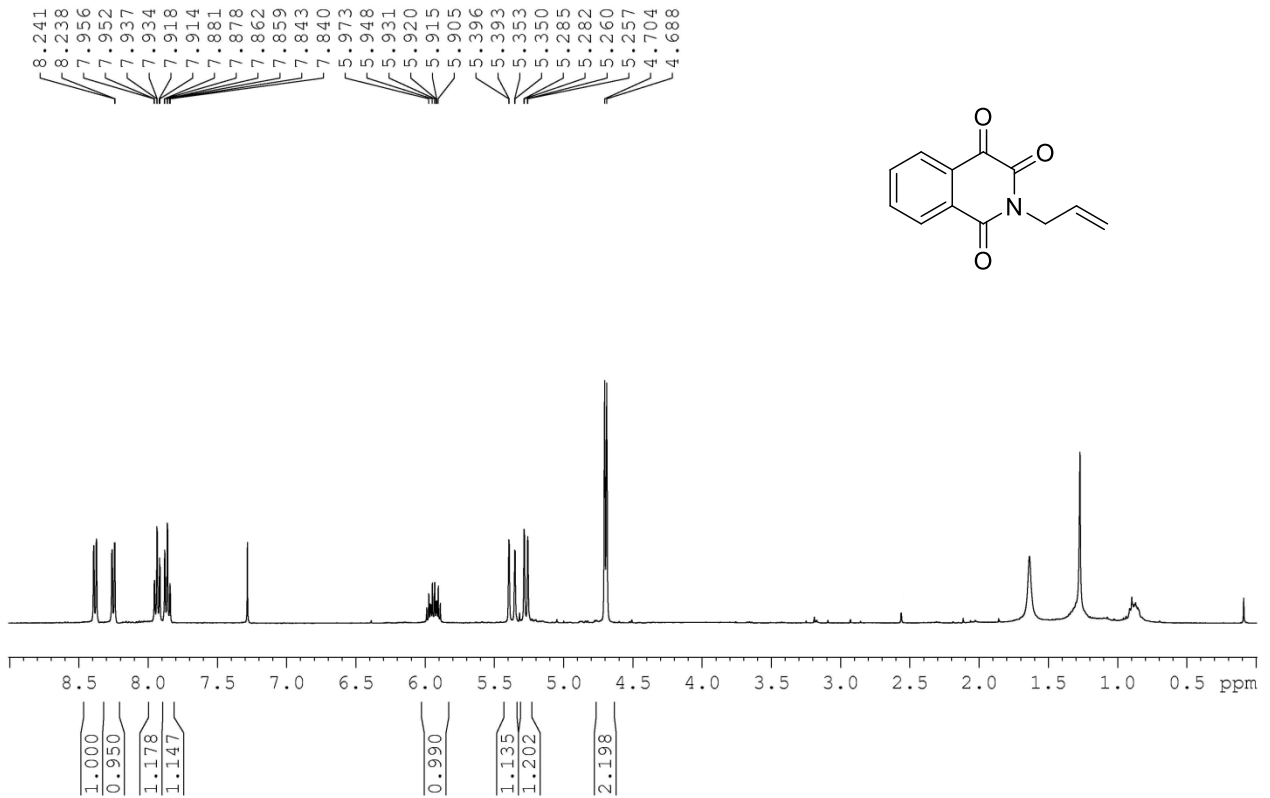



8.393  
8.390  
8.373  
8.371  
8.253  
8.250  
8.234  
8.231  
7.947  
7.931  
7.928  
7.912  
7.909  
7.871  
7.868  
7.852  
7.849

4.181  
4.163  
4.146  
4.128

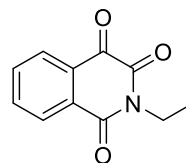

1.343  
1.325  
1.307

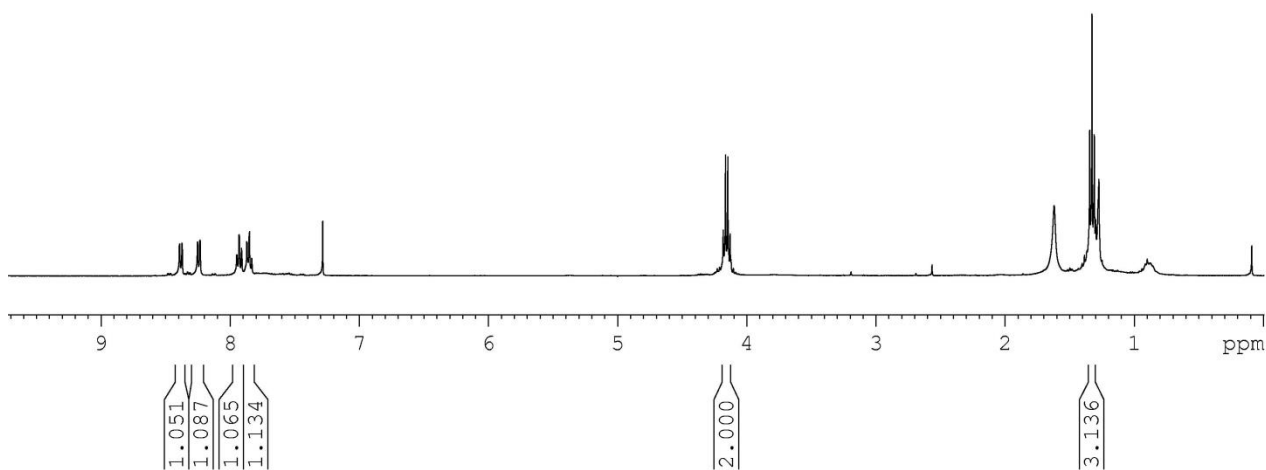

174.666

161.881

156.737

135.946  
134.290  
130.707  
129.916  
129.684  
127.690

36.314

13.087

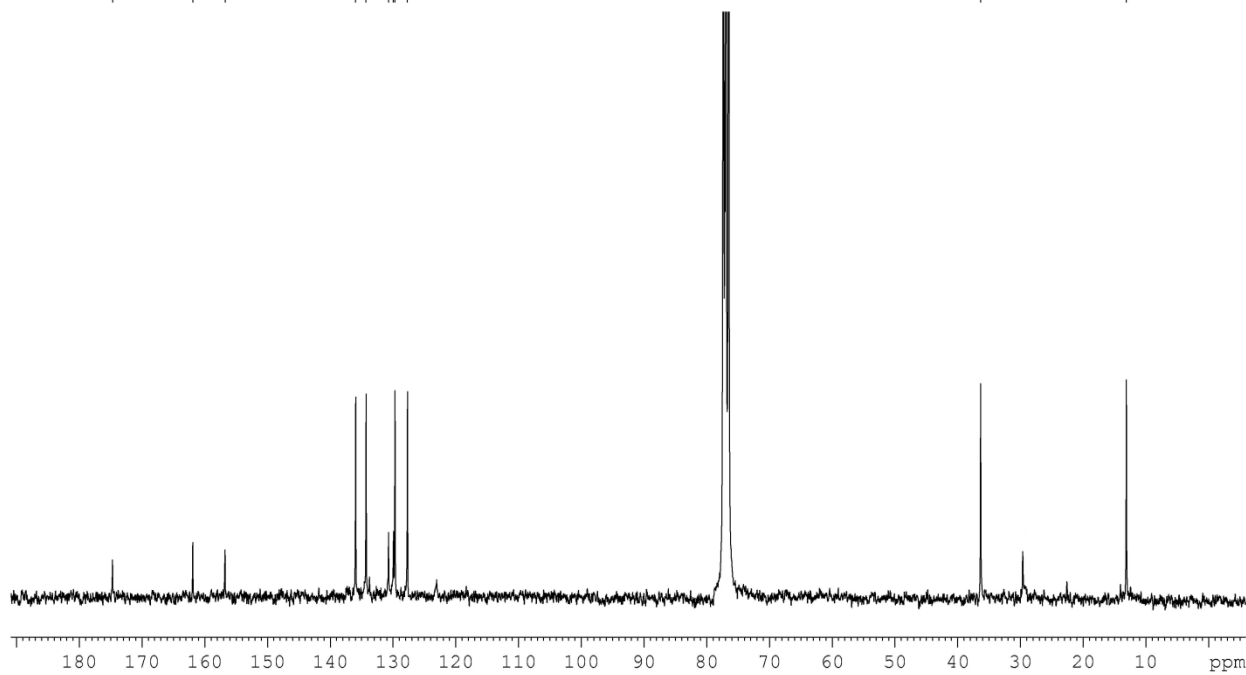

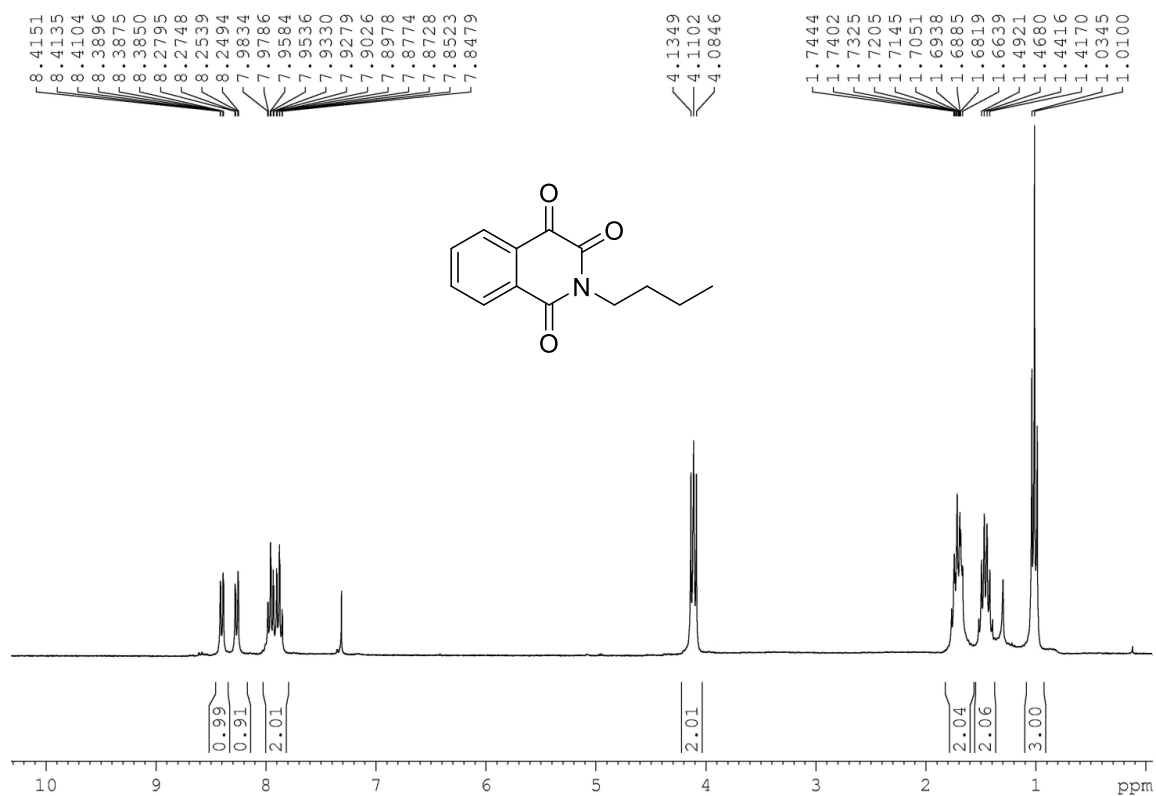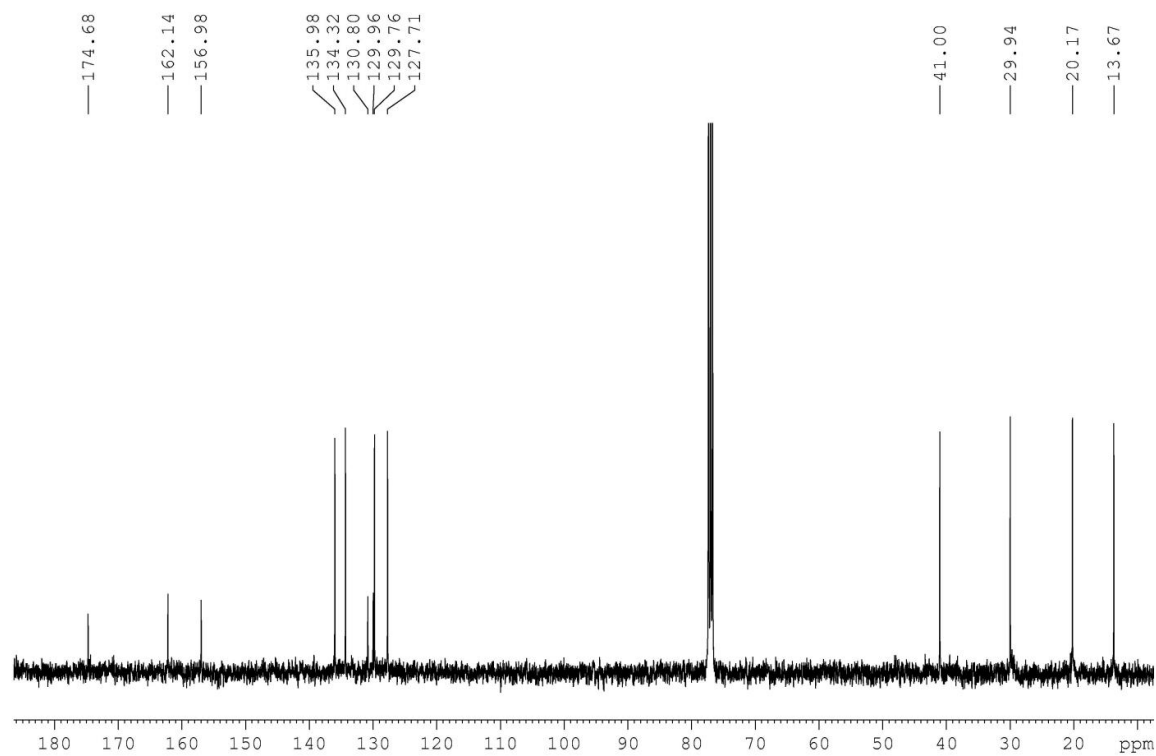

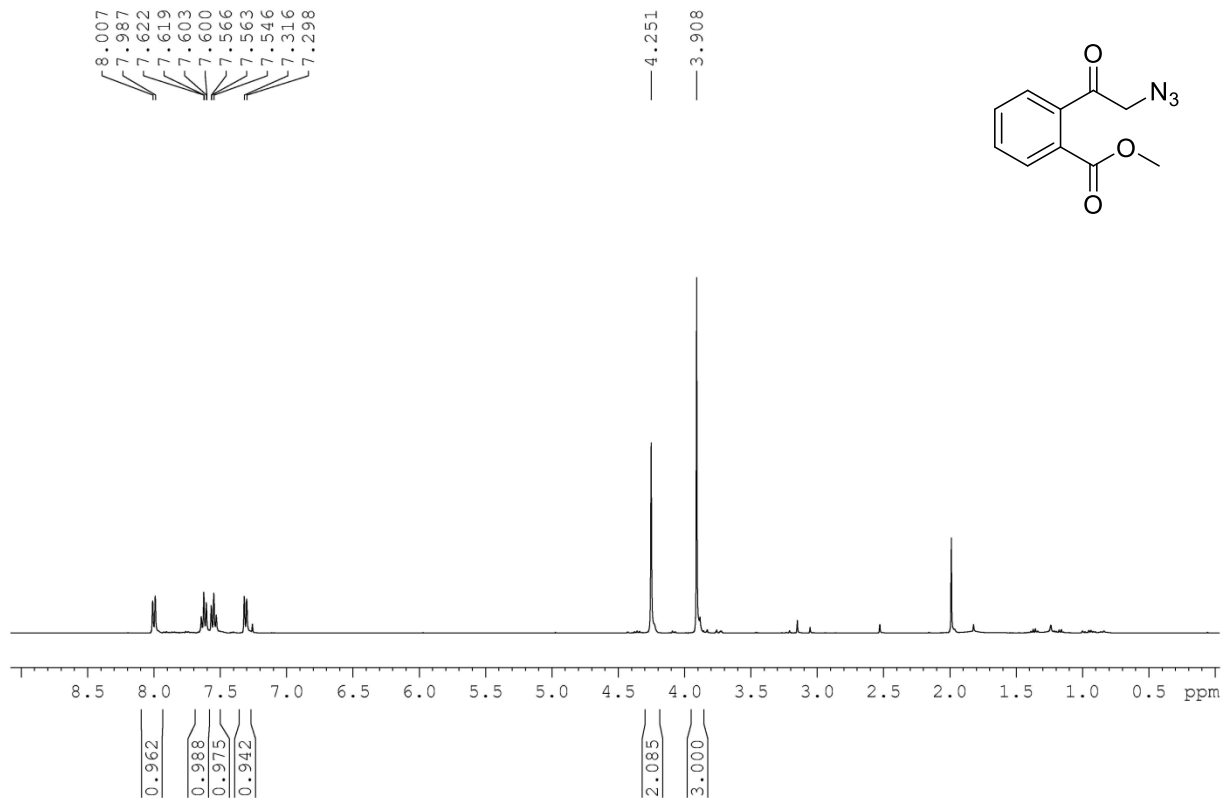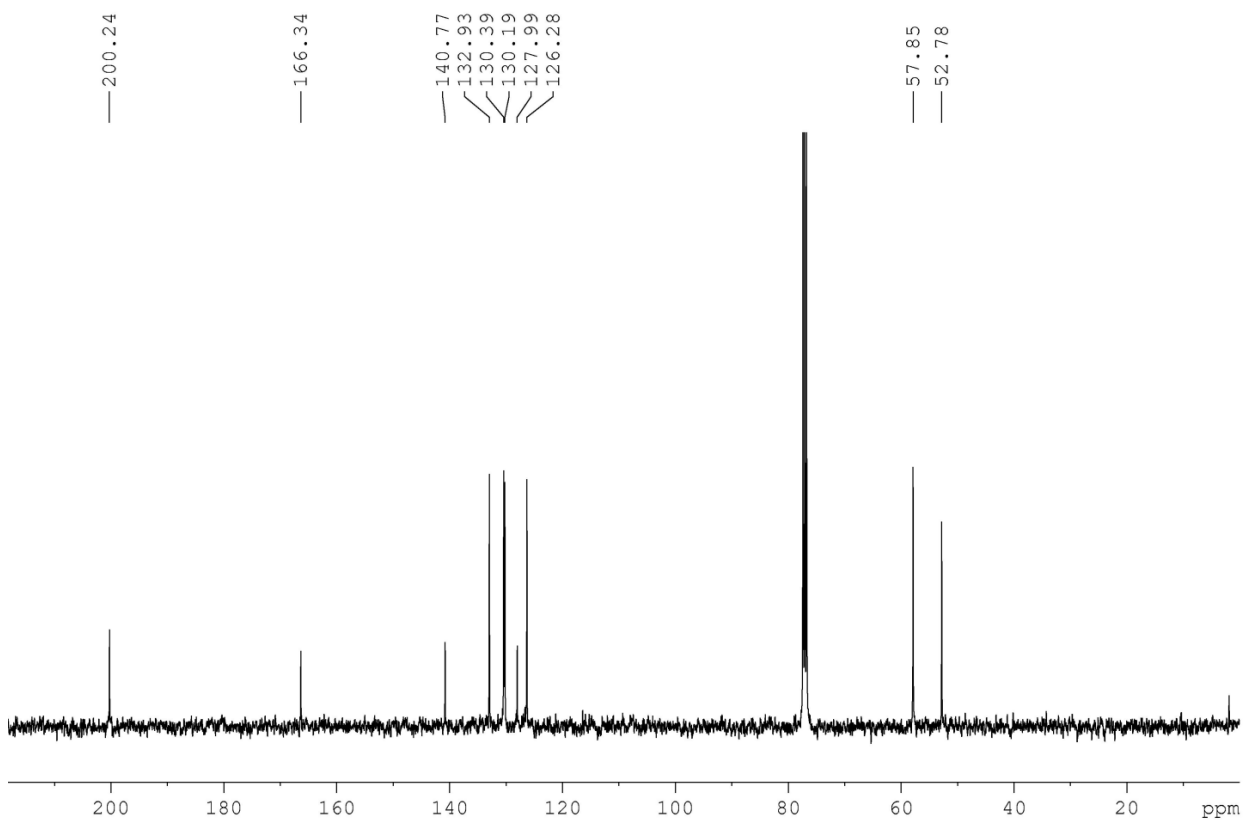

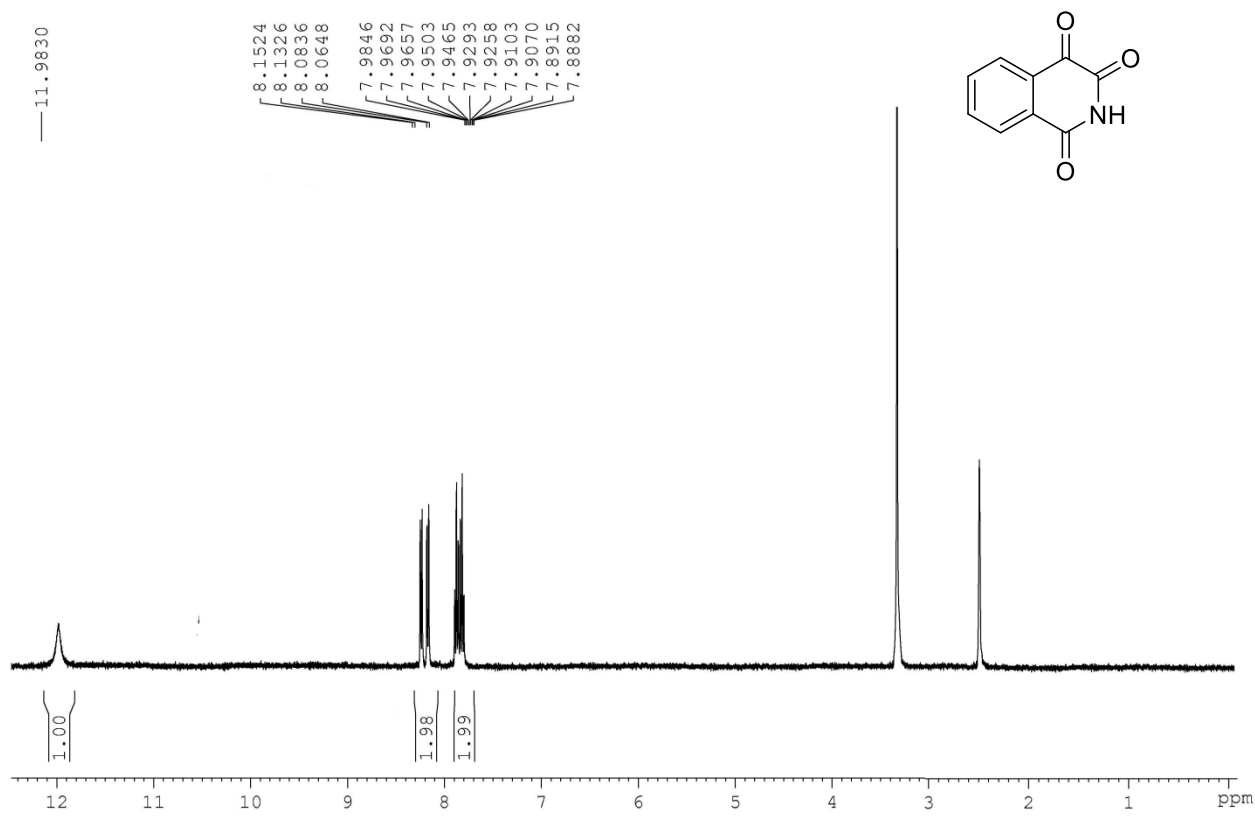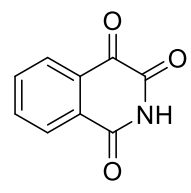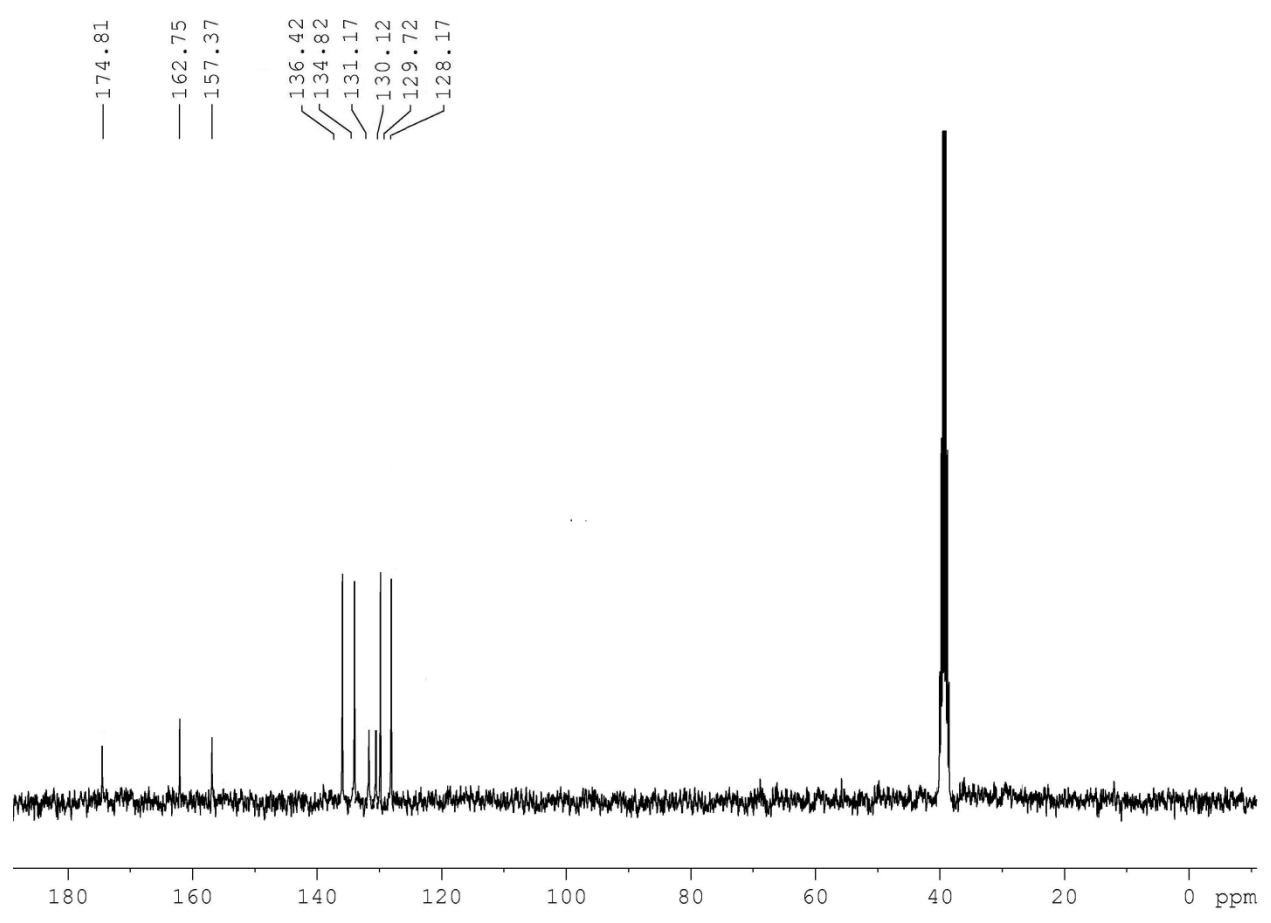

Supplement: s001 [file molecules-24-02177-s001.pdf]
